# Supplementary material
Source: PubMed Central journal article supplement (PMC1502477)

**A**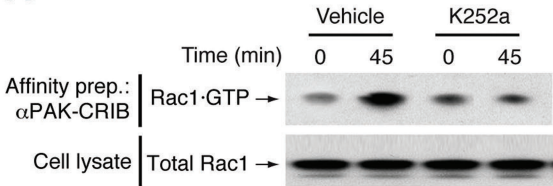**B**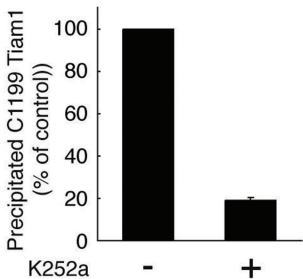

Supplement: pnas_0603914103_1.pdf [file pnas_0603914103_1.pdf]

**A**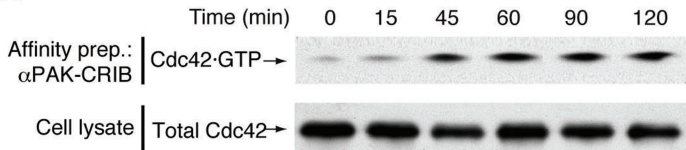**B**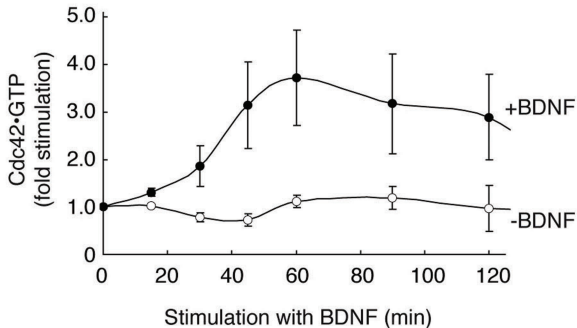

Supplement: pnas_0603914103_2.pdf [file pnas_0603914103_2.pdf]

**A**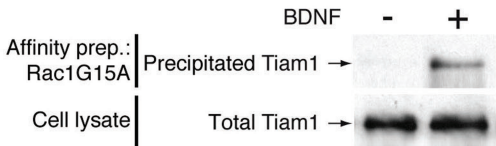**B**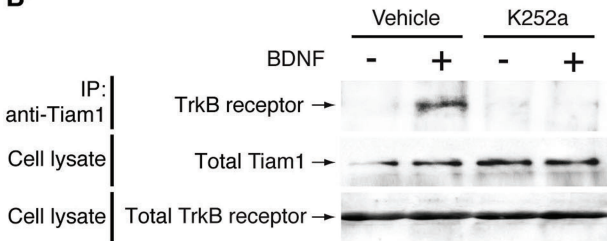**C**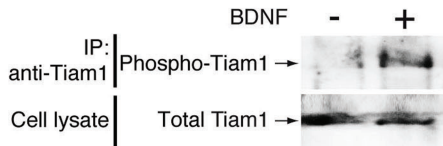

Supplement: pnas_0603914103_3.pdf [file pnas_0603914103_3.pdf]

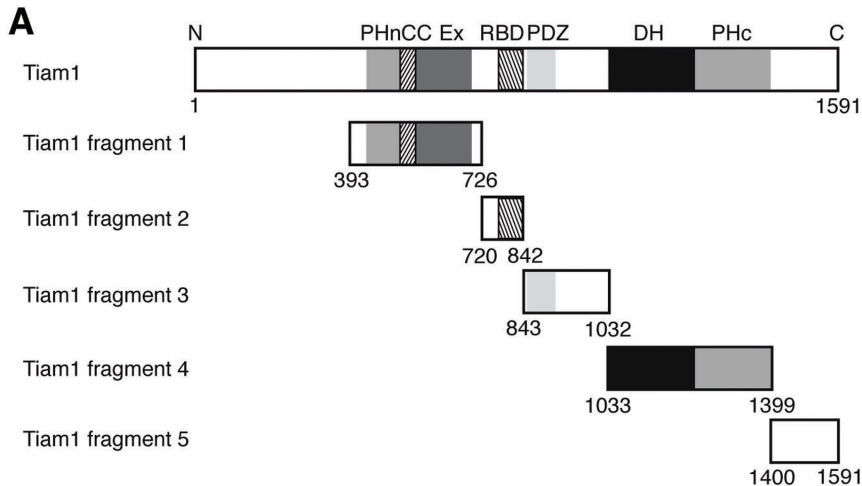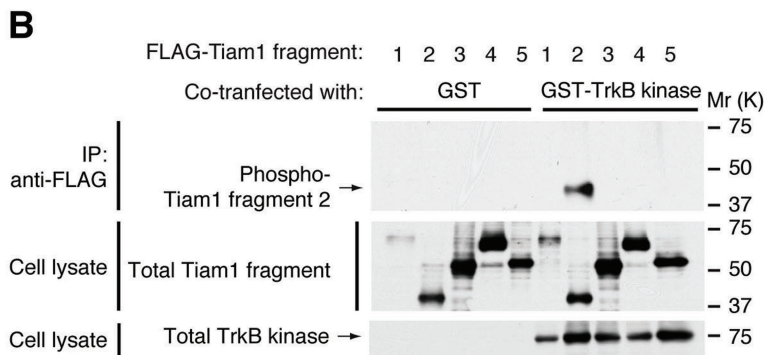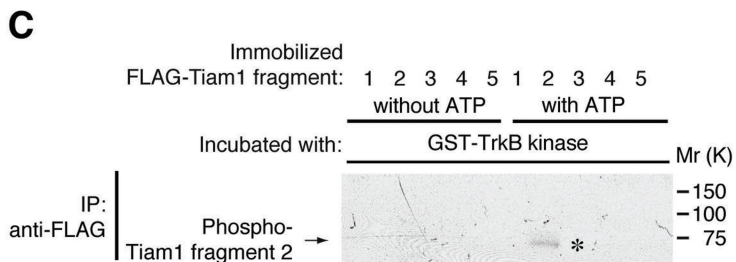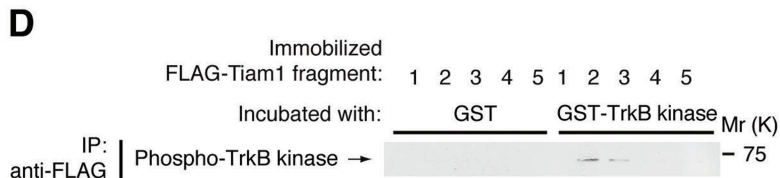

Supplement: pnas_0603914103_4.pdf [file pnas_0603914103_4.pdf]

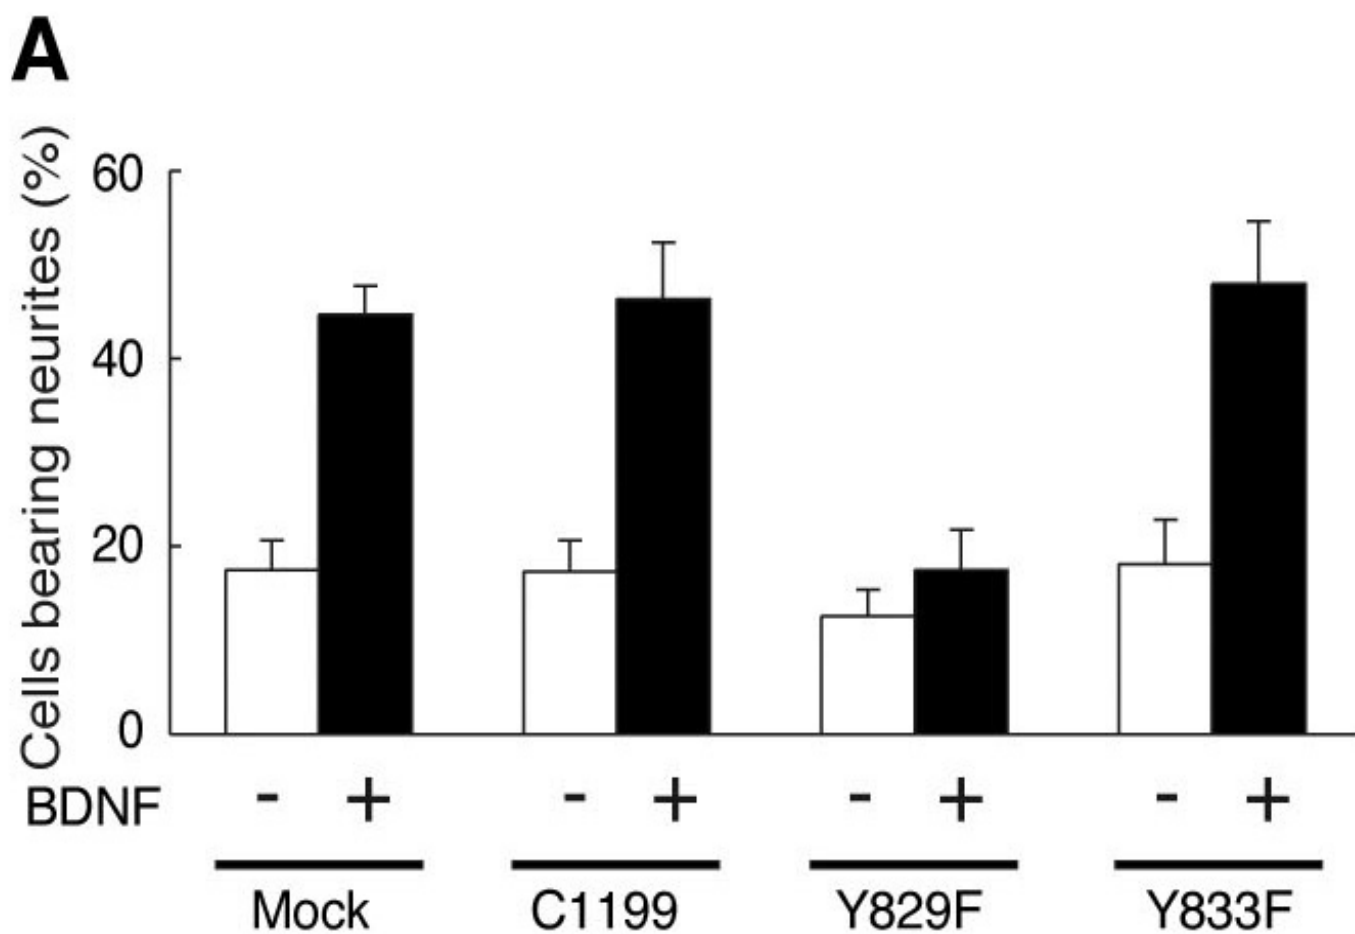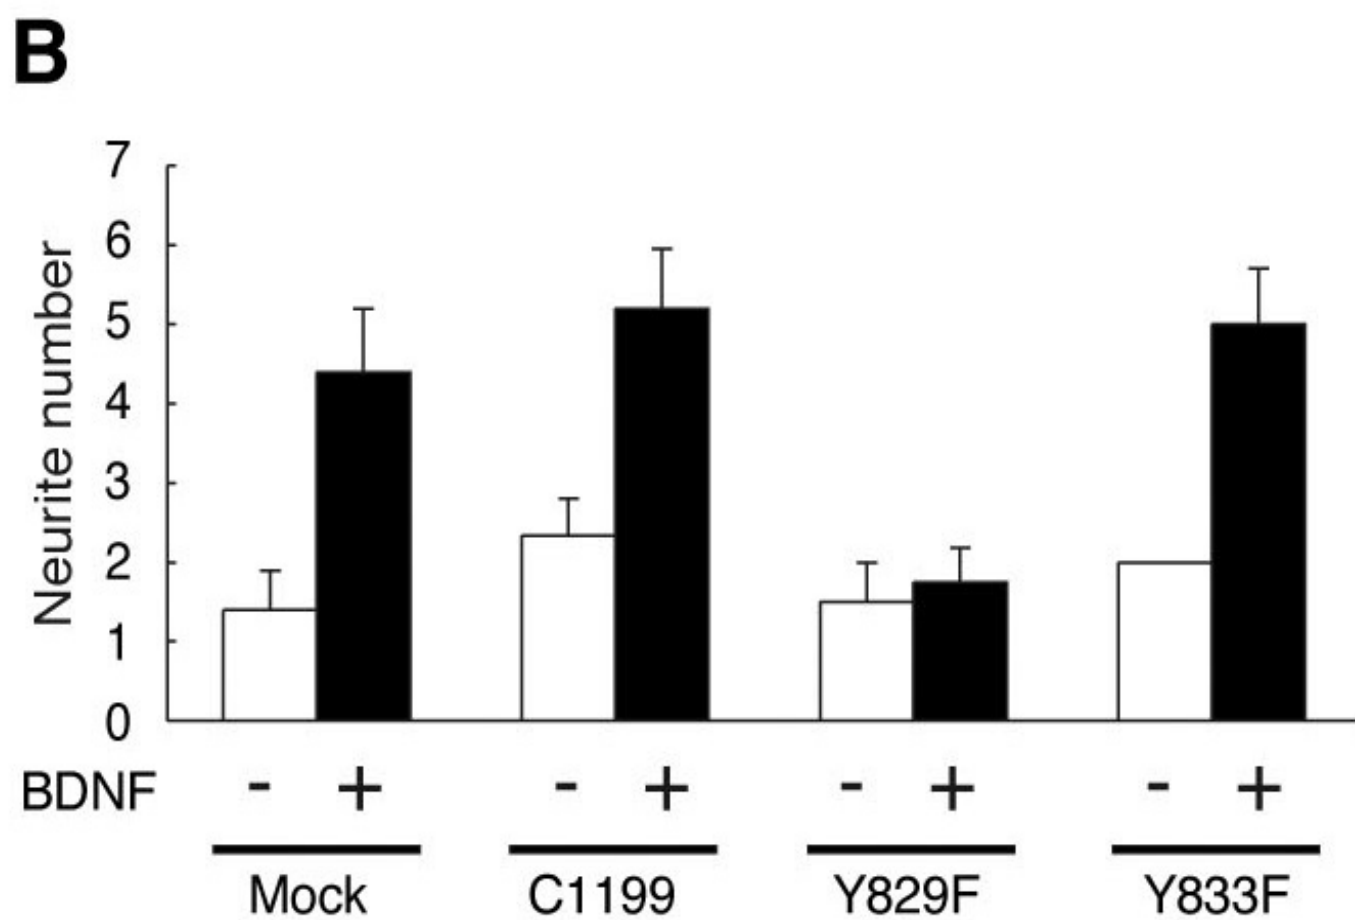

Supplement: pnas_0603914103_5.pdf [file pnas_0603914103_5.pdf]

**A**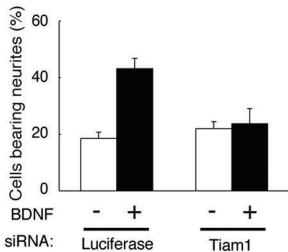**B**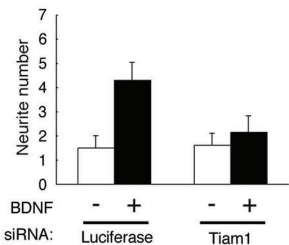**C**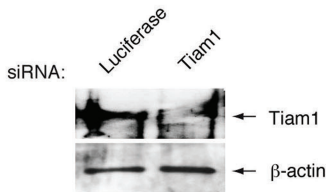

Supplement: pnas_0603914103_6.pdf [file pnas_0603914103_6.pdf]
